# Supplementary material for: Odronextamab monotherapy in patients with relapsed/refractory diffuse large B cell lymphoma: primary efficacy and safety analysis in phase 2 ELM-2 trial
Source: Springer Nature journal article supplement (doi:10.1038/s43018-025-00921-6), 2025-03-17
Supplement: MOESM4 [file 43018_2025_921_MOESM4_ESM.pdf › 43018_2025_921_MOESM4_ESM.pdf]

## Items to include when reporting a randomized trial in a journal or conference abstract

| Item               | Description                                                                                                 | Reported on line number                                                                                                                      |
|--------------------|-------------------------------------------------------------------------------------------------------------|----------------------------------------------------------------------------------------------------------------------------------------------|
| Title              | Identification of the study as randomized                                                                   | NA – not randomized (single arm)                                                                                                             |
| Authors *          | Contact details for the corresponding author                                                                | Y – not in abstract due to word limit but on page 2 beneath affiliations                                                                     |
| Trial design       | Description of the trial design (e.g. parallel, cluster, non-inferiority)                                   | Y – phase 2, multicohort included on line 1 of abstract (p3)                                                                                 |
| Methods            |                                                                                                             |                                                                                                                                              |
| Participants       | Eligibility criteria for participants and the settings where the data were collected                        | Y – eligibility info on lines 2-3 of abstract. Further details on eligibility and data collection settings provided on p14-15 of manuscript. |
| Interventions      | Interventions intended for each group                                                                       | Y – lines 4-7 of abstract                                                                                                                    |
| Objective          | Specific objective or hypothesis                                                                            | Y – primary and secondary endpoints on lines 7-9 of abstract                                                                                 |
| Outcome            | Clearly defined primary outcome for this report                                                             | Y - primary endpoint on line 7 of abstract                                                                                                   |
| Randomization      | How participants were allocated to interventions                                                            | NA                                                                                                                                           |
| Blinding (masking) | Whether or not participants, care givers, and those assessing the outcomes were blinded to group assignment | Y – not in abstract due to word limit but blinding information provided on p9 of manuscript                                                  |
| Results            |                                                                                                             |                                                                                                                                              |
| Numbers randomized | Number of participants randomized to each group                                                             | NA                                                                                                                                           |
| Recruitment        | Trial status                                                                                                | Y – “ongoing” in line 1 of abstract                                                                                                          |
| Numbers analysed   | Number of participants analysed in each group                                                               | Y – N numbers provided on lines 9-16 of abstract                                                                                             |
| Outcome            | For the primary outcome, a result for each group and the estimated effect size and its precision            | Y – ORR result provided on line 10 of abstract. Effect size and precision details not included in the abstract due to word limit but         |

|                    |                                                |                                                                                                                      |
|--------------------|------------------------------------------------|----------------------------------------------------------------------------------------------------------------------|
|                    |                                                | can be found on p19 of the manuscript.                                                                               |
| Harms              | Important adverse events or side effects       | Y – CRS, ICANS, and infections data provided on lines 13-17 of abstract                                              |
| Conclusions        | General interpretation of the results          | Y – lines 17-18 of abstract                                                                                          |
| Trial registration | Registration number and name of trial register | Y – line 19 of abstract                                                                                              |
| Funding            | Source of funding                              | Y – not included in the abstract due to word limit but included in the acknowledgements section on p21 of manuscript |

*\*this item is specific to conference abstracts*
